# Supplementary material for: ABC Assay: Method Development and Application to Quantify the Role of Three DWV Master Variants in Overwinter Colony Losses of European Honey Bees
Source: MDPI journal article supplement (doi:10.3390/v9110314), 2017-10-27
Supplement: s1 [file s1]

A

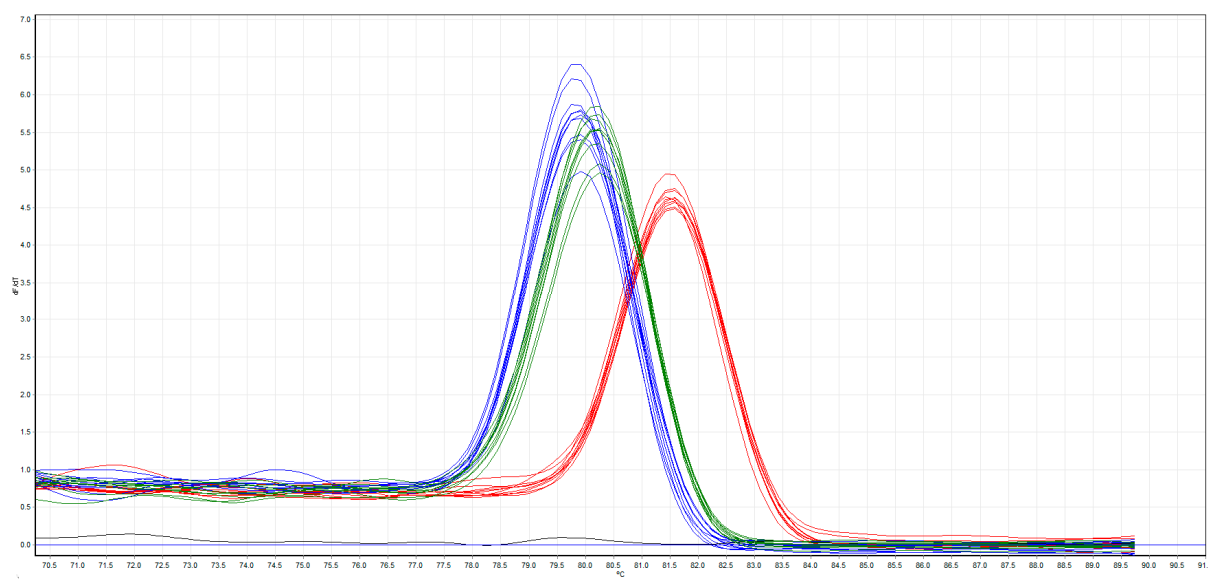

B

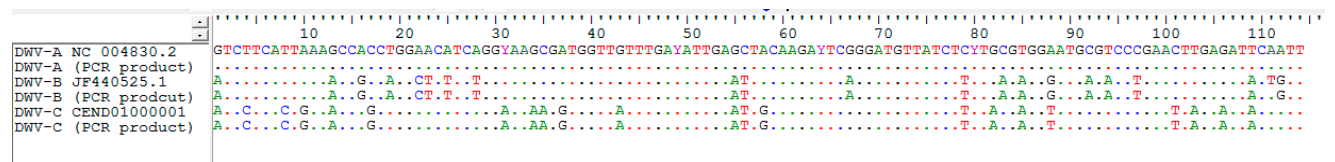

Figure S1: Validation of specificity of target amplification through A) Melt curve analysis and B) sequencing of resultant PCR product.

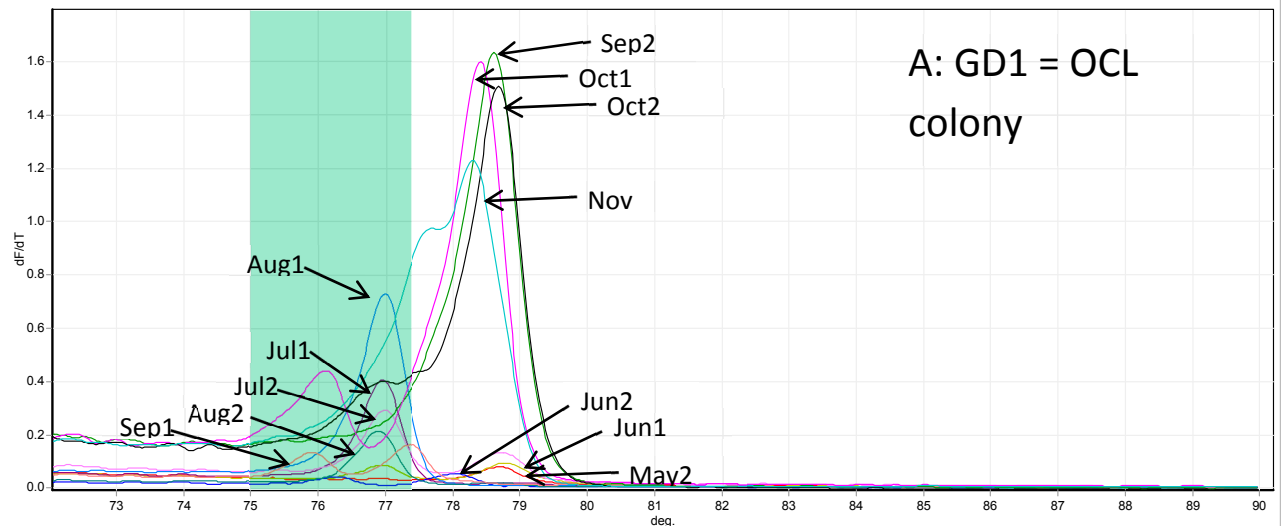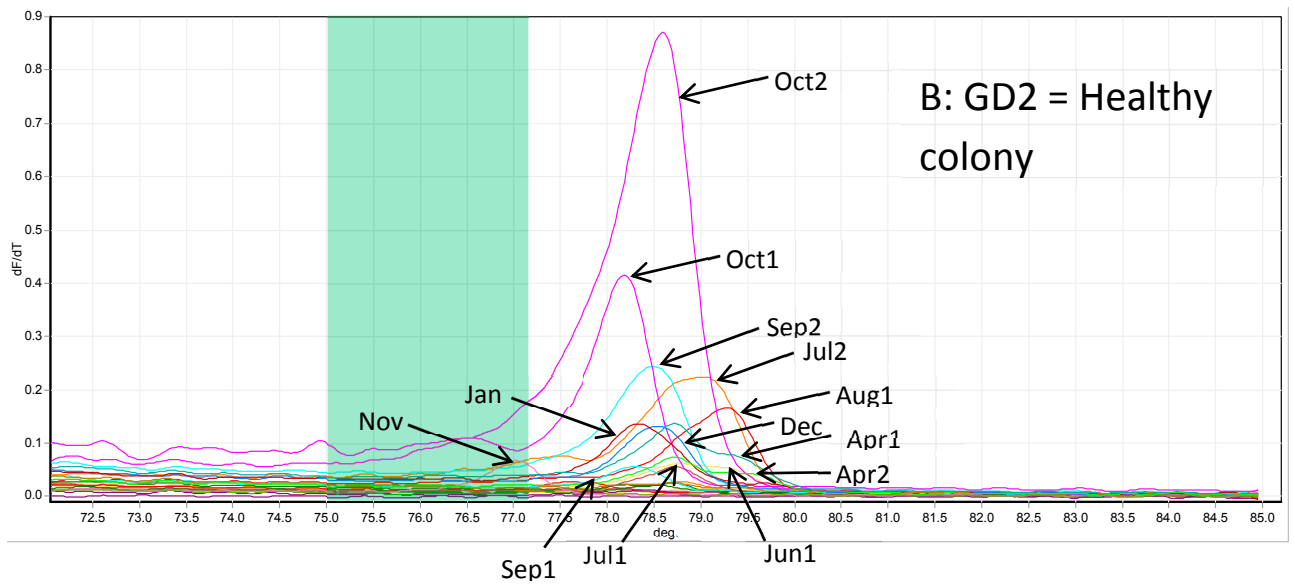

**Figure S2** HRM melt curves of monthly samples from colonies that A) GD1 = collapsed during the over-wintering period, i.e. over-wintering colony loss (OCL) and B) GD2 = survived the following year, i.e. healthy colony. Shaded area indicates the melt position of the type B or C variants in the months may to Sep in the OCL colony.
